# Supplementary material for: Tribbles ortholog NIPI-3 and bZIP transcription factor CEBP-1 regulate a Caenorhabditis elegans intestinal immune surveillance pathway
Source: PubMed Central journal article supplement (PMC5143455; doi:10.1186/s12915-016-0334-6), 2016-12-07

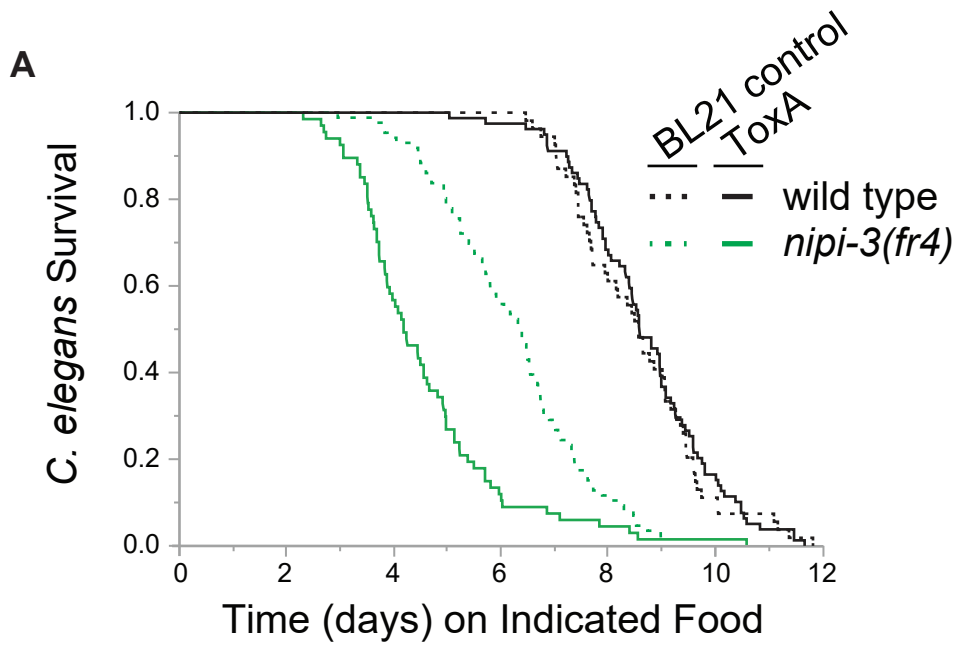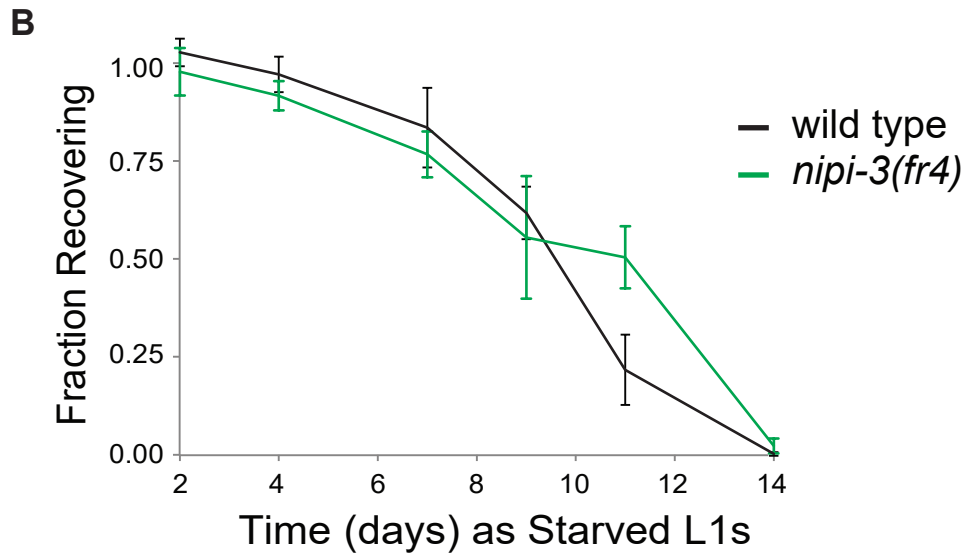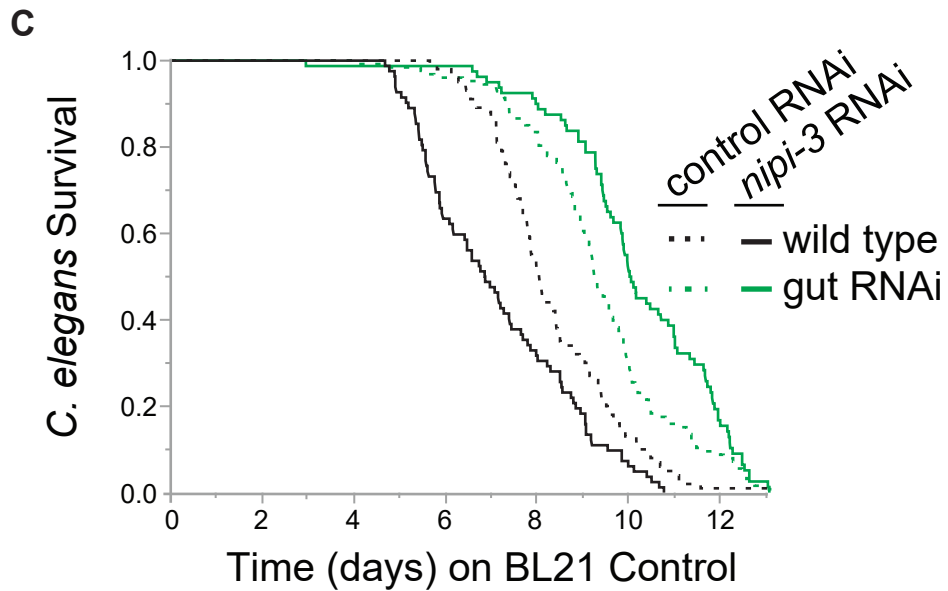

Supplement: 12915_2016_334_MOESM2_ESM.pdf [file 12915_2016_334_MOESM2_ESM.pdf]
